# Supplementary material
Source: Springer Nature journal article supplement (https://mijn.bsl.nl/resource/supplementary/13047_2008_94_MOESM3_ESM.pdf/7109654)
Supplement: MOESM3 [file 7109654]

a) Peak pressure

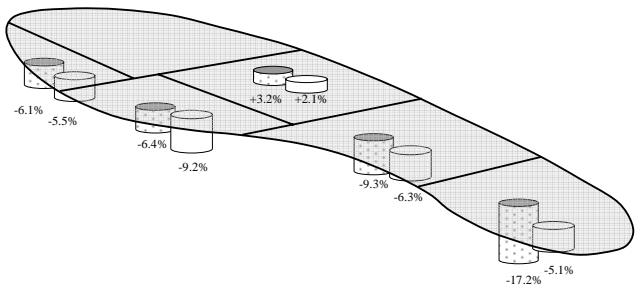

b) Maximum pressure

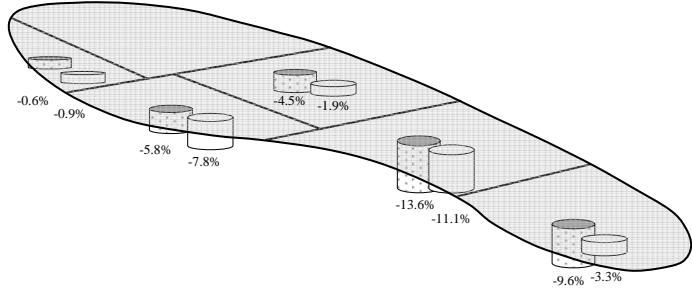

c) Pressure time integral

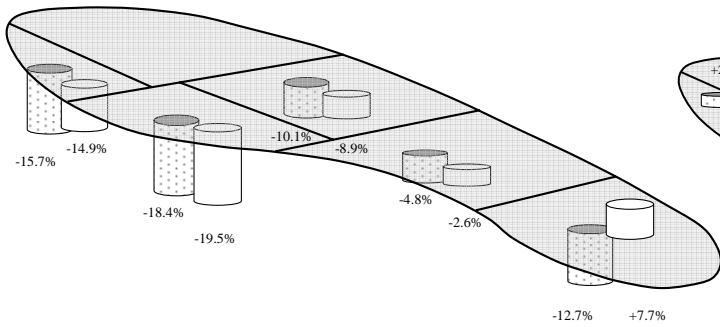

d) Maximum force

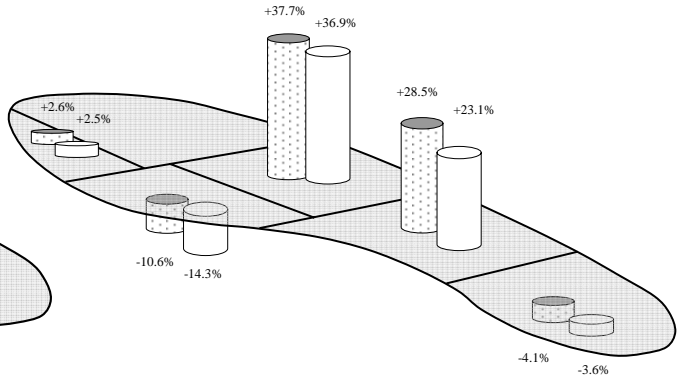

e) Force time integral

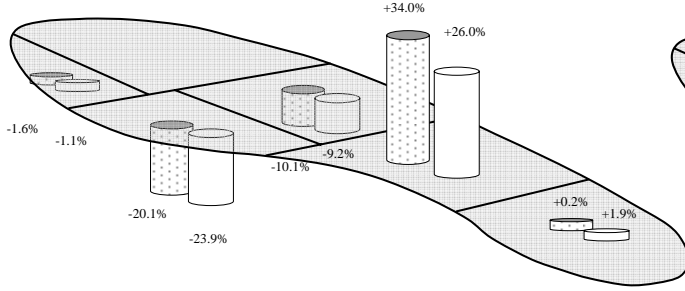

f) Area

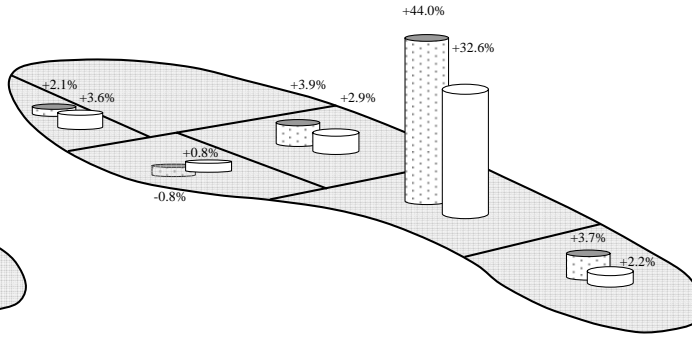

g) Time (as a % of roll over)

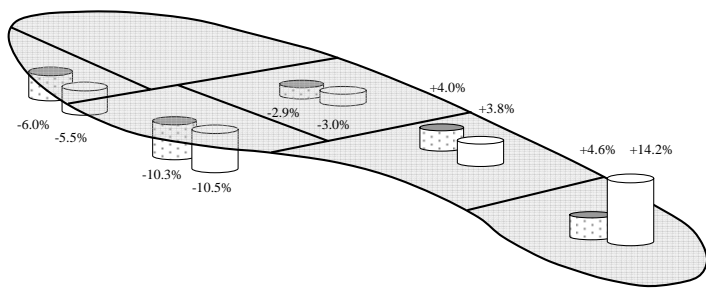

**Key**

- Customised orthoses
- Prefabricated orthoses
